# Supplementary material
Source: MDPI journal article supplement (https://www.mdpi.com/2075-163X/13/4/553)
Supplement: s1 [file s1]

## Supporting Materials

### Characterization of an Amazon soil profile by laser-induced breakdown, Raman, and fluorescence spectroscopies

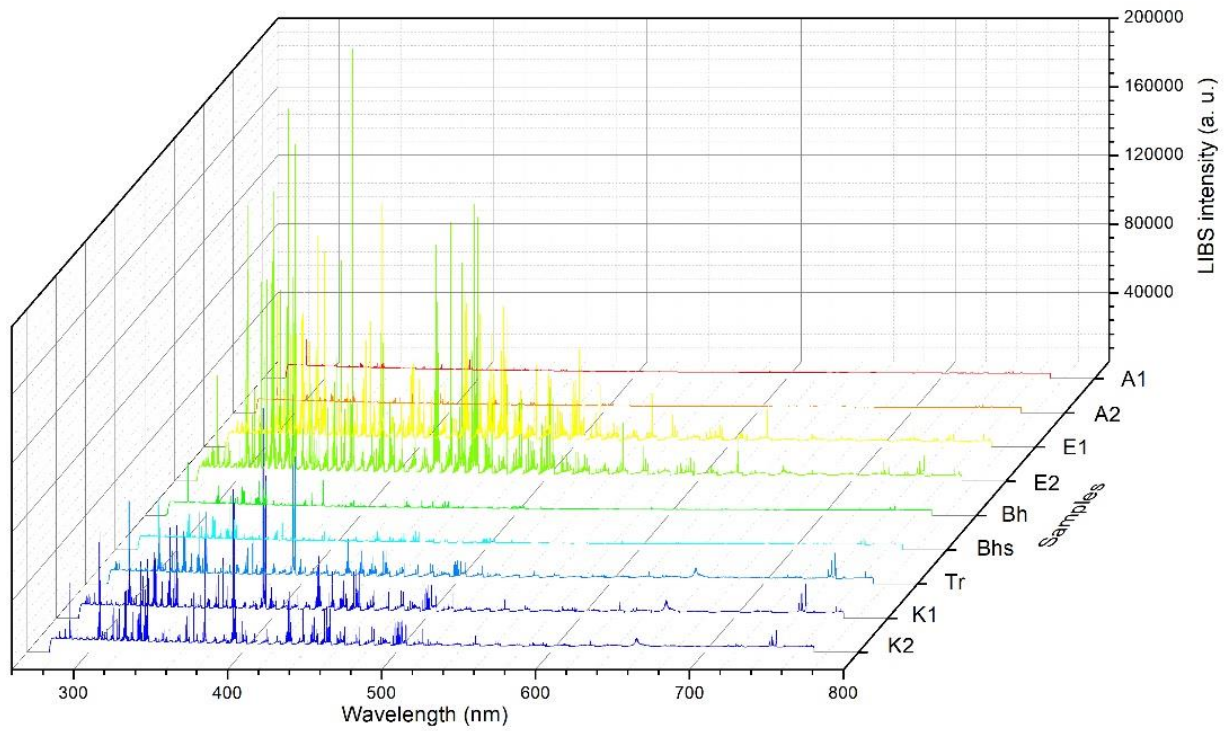

**Figure S1.** Average LIBS spectra in the VIS region of soil samples from all horizons.

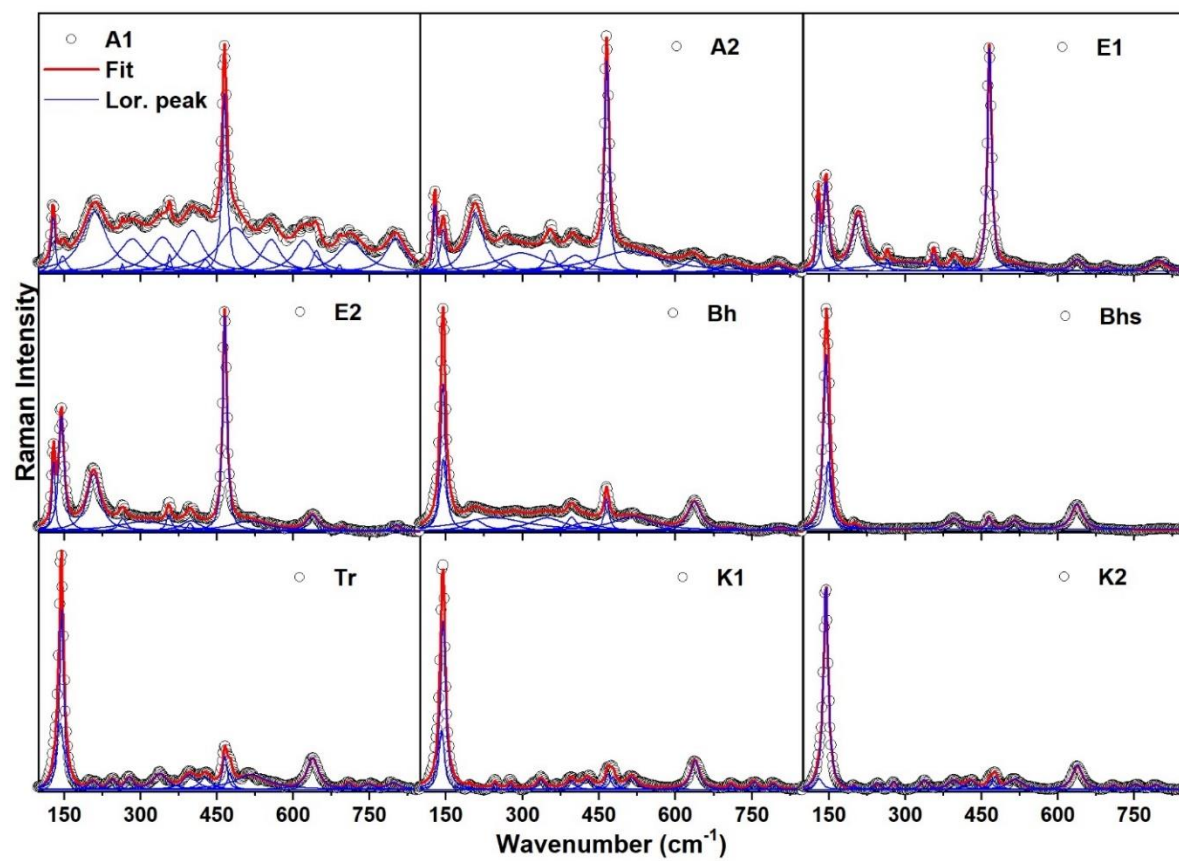

Figure S2. Deconvoluted spectra resolved from curve-fitting and fitted spectrum from different layers.

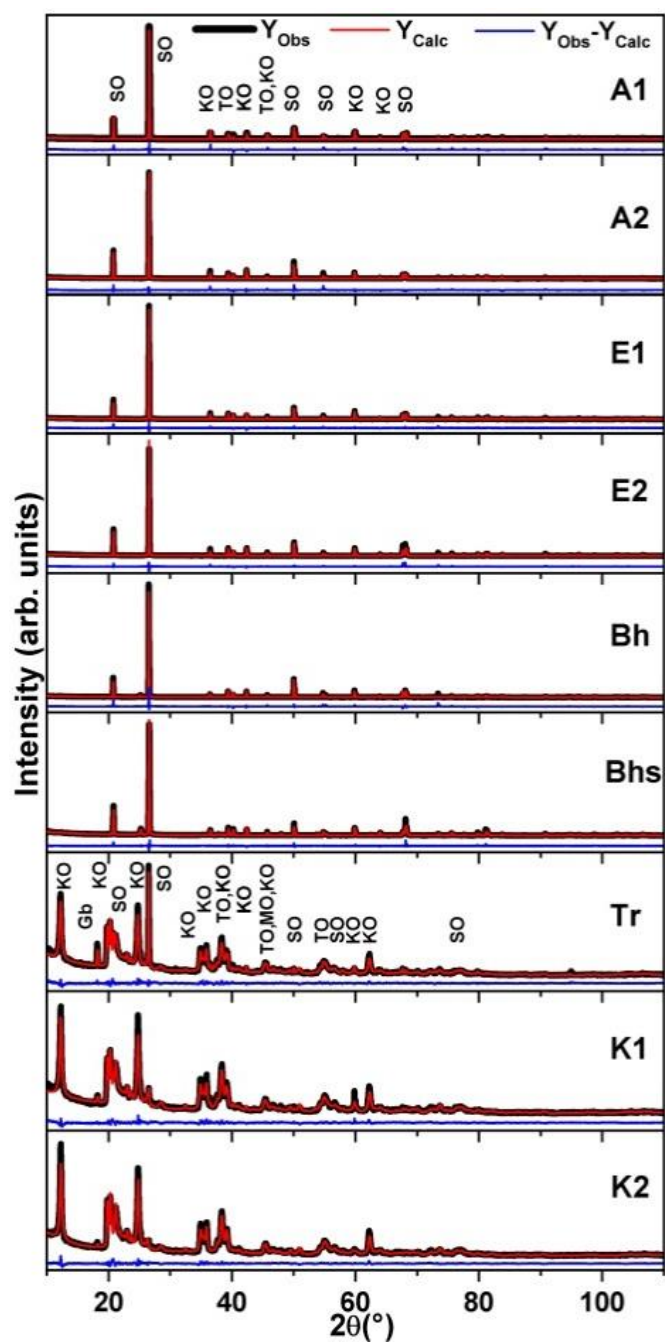

**Figure S3.** Rietveld refinement of their XRPD patterns. SO quartz, KO kaolinite, Gb gibbsite, TO titanium oxide (anatase), MO muscovite. (Adapted from Huaman [4]). Copyright 2021, with permission from Springer.

**Table S1.** Raman wavenumbers (cm<sup>-1</sup>) were observed for quartz (SO), kaolinite (KO), gibbsite (Gb), anatase (TO), and muscovite (MO) from different layers.

[illegible]

| Bh |                                 |                             |                         | Bhs |                                 |                             |                         | Tr |                                 |                             |                      | K1 |                                 |                             |                      |
|----|---------------------------------|-----------------------------|-------------------------|-----|---------------------------------|-----------------------------|-------------------------|----|---------------------------------|-----------------------------|----------------------|----|---------------------------------|-----------------------------|----------------------|
|    | $\omega$<br>(cm <sup>-1</sup> ) | FWHM<br>(cm <sup>-1</sup> ) | M <sub>I</sub><br>(a.u) |     | $\omega$<br>(cm <sup>-1</sup> ) | FWHM<br>(cm <sup>-1</sup> ) | M <sub>I</sub><br>(a.u) |    | $\omega$<br>(cm <sup>-1</sup> ) | FWHM<br>(cm <sup>-1</sup> ) | M <sub>I</sub> (a.u) |    | $\omega$<br>(cm <sup>-1</sup> ) | FWHM<br>(cm <sup>-1</sup> ) | M <sub>I</sub> (a.u) |
| TO | 144.63                          | 11.07                       | 0.373                   | TO  | 144.82                          | 11.85                       | 0.240                   | TO | 142.17                          | 18.99                       | 0.033                | TO | 142.20                          | 12.07                       | 0.030                |
| KO | 145.69                          | 15.34                       | 0.181                   | KO  | 149.04                          | 11.71                       | 0.092                   | KO | 144.89                          | 9.84                        | 0.090                | KO | 144.95                          | 11.41                       | 0.08                 |
| SO | 207.46                          | 42.25                       | 0.027                   | TO  | 201.83                          | 12.01                       | 0.006                   | SO | 206.94                          | 22.74                       | 0.004                | TO | 197.57                          | 3.73                        | 0.001                |
| KO | 243.77                          | 159.85                      | 0.032                   | KO  | 396.46                          | 31.79                       | 0.015                   | KO | 244.71                          | 20.51                       | 0.005                | KO | 247.20                          | 7.24                        | 0.003                |
| KO | 287.43                          | 39.17                       | 0.0134                  | SO  | 465.08                          | 11.30                       | 0.016                   | MO | 278.50                          | 20.14                       | 0.006                | MO | 277.15                          | 8.70                        | 0.002                |
| KO | 348.63                          | 83.22                       | 0.0322                  | TO  | 515.38                          | 23.10                       | 0.012                   | KO | 338.33                          | 36.66                       | 0.007                | KO | 336.92                          | 15.76                       | 0.005                |
| KO | 397.09                          | 24.59                       | 0.034                   | TO  | 638.01                          | 26.91                       | 0.034                   | KO | 396.72                          | 33.32                       | 0.007                | KO | 396.19                          | 17.66                       | 0.004                |
| KO | 422.99                          | 66.69                       | 0.020                   | SO  | 802.69                          | 20.30                       | 0.002                   | KO | 428.30                          | 26.90                       | 0.006                | KO | 427.93                          | 22.90                       | 0.005                |
| SO | 465.65                          | 11.04                       | 0.082                   |     |                                 |                             |                         | SO | 466.06                          | 10.93                       | 0.017                | SO | 468.34                          | 13.24                       | 0.007                |
| TO | 516.28                          | 99.29                       | 0.035                   |     |                                 |                             |                         | Gb | 476.23                          | 12.17                       | 0.008                | Gb | 477.66                          | 15.52                       | 0.006                |
| TO | 637.90                          | 31.56                       | 0.072                   |     |                                 |                             |                         | TO | 517.79                          | 83.09                       | 0.007                | TO | 514.76                          | 24.01                       | 0.006                |
| KO | 711.14                          | 36.27                       | 0.006                   |     |                                 |                             |                         | TO | 638.85                          | 27.78                       | 0.015                | TO | 638.86                          | 20.32                       | 0.014                |
| SO | 805.89                          | 42.30                       | 0.010                   |     |                                 |                             |                         | KO | 709.64                          | 16.96                       | 0.003                | KO | 709.46                          | 12.04                       | 0.002                |
|    |                                 |                             |                         |     |                                 |                             |                         | KO | 749.66                          | 31.57                       | 0.002                | KO | 754.63                          | 14.05                       | 0.003                |
|    |                                 |                             |                         |     |                                 |                             |                         | KO | 797.45                          | 34.41                       | 0.003                | KO | 792.69                          | 16.19                       | 0.002                |

|    | K2                              |                             |                         |
|----|---------------------------------|-----------------------------|-------------------------|
|    | $\omega$<br>(cm <sup>-1</sup> ) | FWHM<br>(cm <sup>-1</sup> ) | M <sub>I</sub><br>(a.u) |
| SO | 130.94                          | 17.59                       | 0.005                   |
| KO | 144.35                          | 11.15                       | 0.103                   |
| TO | 199.42                          | 8.42                        | 0.002                   |
| KO | 244.93                          | 15.25                       | 0.003                   |
| MO | 277.69                          | 12.09                       | 0.004                   |
| KO | 337.98                          | 19.67                       | 0.004                   |
| KO | 395.60                          | 28.72                       | 0.004                   |
| KO | 429.04                          | 25.68                       | 0.004                   |
| SO | 467.21                          | 14.23                       | 0.004                   |
| Gb | 477.32                          | 13.38                       | 0.006                   |
| TO | 516.35                          | 35.14                       | 0.005                   |
| TO | 638.91                          | 25.12                       | 0.012                   |
| KO | 709.76                          | 15.76                       | 0.002                   |
| KO | 753.95                          | 24.84                       | 0.002                   |
| KO | 793.20                          | 22.33                       | 0.002                   |
